# Supplementary material for: Plasma Neurofilament Light Chain and Clinical Diagnosis in Frontotemporal Dementia Syndromes
Source: PubMed Central journal article supplement — J Alzheimers Dis. 2022 Oct 11;89(4):1221–31. doi: 10.3233/JAD-220272 (PMC9661326; doi:10.3233/jad-220272), 2022-10-11
Supplement: jad-89-jad220272-s001.pdf [file jad-89-jad220272-s001.pdf]

# Supplementary Material

## Plasma Neurofilament Light Chain and Clinical Diagnosis in Frontotemporal Dementia Syndromes

**Supplementary Figure 1.** Boxplot comparing Quanterix HD-X™ and Quanterix SR-X™

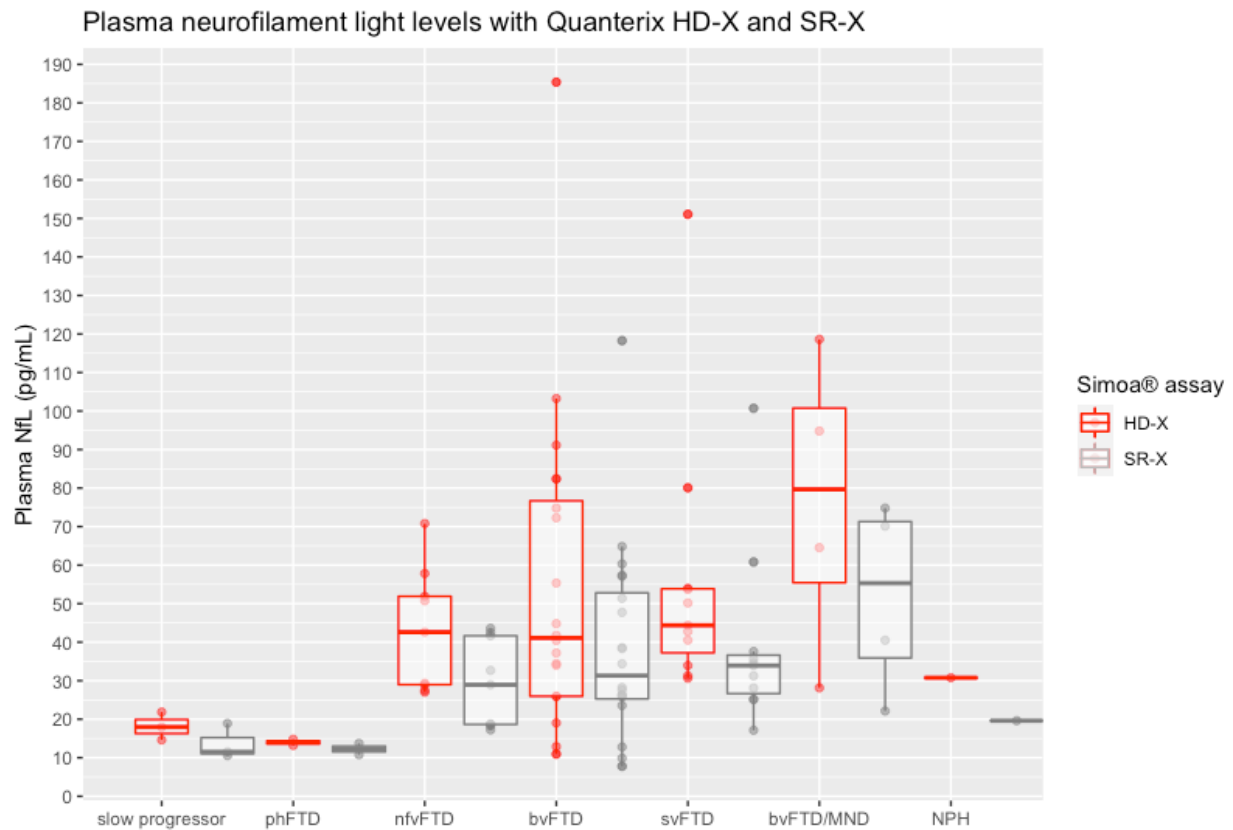

Median NfL is represented in the boxplot by the thick line. The 1<sup>st</sup> and 3<sup>rd</sup> quartiles are represented by the hinges. The lower and upper whiskers indicate the smallest and largest NfL value that are 1.5 times the interquartile range, respectively. phFTD, frontotemporal dementia phenocopy; nfvFTD, non-fluent variant frontotemporal dementia; bvFTD, behavioral variant frontotemporal dementia; svFTD, semantic variant frontotemporal dementia; MND, motor neuron disease; NPH, normal pressure hydrocephalus

Supplementary Figure 2.

Difference vs. average: Bland-Altman of LOG plasma NfL

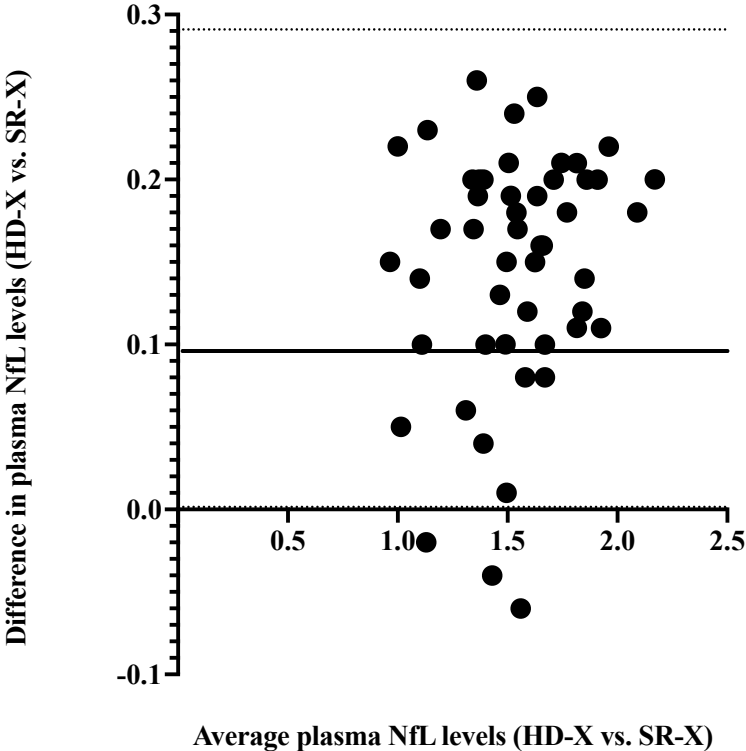

NfL, neurofilament light
